# Supplementary material for: Automated Approach to In Vitro Image-Guided Photothermal Therapy with Top-Down and Bottom-Up-Synthesized Graphene Quantum Dots
Source: MDPI journal article supplement (doi:10.3390/nano13050805), 2023-02-22
Supplement: s1 [file s1]

## Automated Approach to *In Vitro* Image-Guided Photothermal Therapy with Top-Down and Bottom-Up-Synthesized Graphene Quantum Dots

Bong Lee<sup>1</sup>, Gretel A. Stokes<sup>1</sup>, Alina Valimukhametova<sup>1</sup>, Steven Nguyen<sup>1</sup>, Roberto Gonzalez-Rodriguez<sup>2</sup>, Adam Bhaloo<sup>1</sup>, Jeffery Coffey<sup>3</sup>, Anton V. Naumov<sup>1\*</sup>

<sup>1</sup>Department of Physics and Astronomy, Texas Christian University, Fort Worth, TX

<sup>2</sup>Department of Physics University of North Texas, Denton, TX

<sup>3</sup>Department of Chemistry and Biochemistry, Texas Christian University, Fort Worth, TX

\*Correspondence: a.naumov@tcu.edu; Tel.: +1 (713) 253-8775

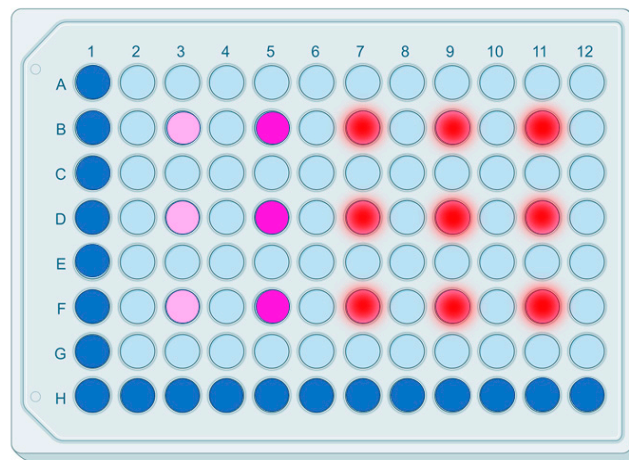

**Figure S1.** *In vitro* PTT setup for a 96-well plate: HeLa cells control (pink), GQD-treated cells (purple), GQD-treated and laser-irradiated cells (red), and heat sink/cleaning station wells for the thermocouple (blue).

**Table S1.** The code controlling the 3D printer for *in vitro* PTT experiments written using computer numerical control program language G-code.

| Code Block                                                                                                                                                                                                                                                | Purpose                     |
|-----------------------------------------------------------------------------------------------------------------------------------------------------------------------------------------------------------------------------------------------------------|-----------------------------|
| <pre> ;FLAVOR:Marlin ;TIME:0 ;Filament used: 0m ;Layer height: 0.2 ;MINX:2.14748e+006 ;MINY:2.14748e+006 ;MINZ:2.14748e+006 ;MAXX:-2.14748e+006 ;MAXY:-2.14748e+006 ;MAXZ:-2.14748e+006 ;Generated with Cura_SteamEngine 4.6.1                     </pre> | <p><b>Start Program</b></p> |

|                                                                                                                                                                                                                                                                                                                                                                                                                                                                                                                                                                                                                                                                                                                                                                                                                                                                                                                                              |                                                                       |
|----------------------------------------------------------------------------------------------------------------------------------------------------------------------------------------------------------------------------------------------------------------------------------------------------------------------------------------------------------------------------------------------------------------------------------------------------------------------------------------------------------------------------------------------------------------------------------------------------------------------------------------------------------------------------------------------------------------------------------------------------------------------------------------------------------------------------------------------------------------------------------------------------------------------------------------------|-----------------------------------------------------------------------|
| <b>M140 S44; Set platform temperature at 44 °C</b><br><b>M105; Report temperature</b><br><b>G28; Home all axes</b><br><b>G0 X0 Y0 Z25 F10000</b>                                                                                                                                                                                                                                                                                                                                                                                                                                                                                                                                                                                                                                                                                                                                                                                             | Warm up platform and position the thermocouple.                       |
| <b>G4 S300</b>                                                                                                                                                                                                                                                                                                                                                                                                                                                                                                                                                                                                                                                                                                                                                                                                                                                                                                                               | Standby for 10 min to warm up wells solution to 37 °C.                |
| <b>G0 X101.4 Y149 Z25 F10000</b><br><b>G0 X101.4 Y149 Z7 F10000; Dip in</b><br><b>G4 S1</b><br><b>G0 X101.4 Y149 Z25 F10000; Dip out</b><br><b>G0 X101.4 Y149 Z25 F10000</b><br><b>G0 X101.4 Y149 Z7 F10000; Dip in</b><br><b>G4 S1</b><br><b>G0 X101.4 Y149 Z25 F10000; Dip out</b><br><b>G0 X101.4 Y149 Z25 F10000</b><br><b>G0 X101.4 Y149 Z7 F10000; Dip in</b><br><b>G4 S1</b><br><b>G0 X101.4 Y149 Z25 F10000; Dip out</b>                                                                                                                                                                                                                                                                                                                                                                                                                                                                                                             | Thermocouple cleanup.                                                 |
| <b>G0 X154 Y148 Z25 F10000; Laser Start Position</b><br><b>G4 S30</b><br><b>G0 X119.4 Y139 Z25 F10000</b><br><b>G0 X119.4 Y139 Z7 F10000; Dip in</b><br><b>G4 S1</b><br><b>G0 X119.4 Y139 Z25 F10000; Dip out</b><br><b>G0 X119.4 Y139 Z25 F10000</b><br><b>G0 X119.4 Y139 Z7 F10000; Dip in</b><br><b>G4 S1</b><br><b>G0 X119.4 Y139 Z25 F10000; Dip out</b><br><b>G0 X119.4 Y139 Z25 F10000</b><br><b>G0 X119.4 Y139 Z7 F10000; Dip in</b><br><b>G4 S30</b><br><b>G0 X119.4 Y139 Z25 F10000; Dip out</b><br><b>G0 X101.4 Y140 Z25 F10000</b><br><b>G0 X101.4 Y140 Z7 F10000; Dip in</b><br><b>G4 S1</b><br><b>G0 X101.4 Y140 Z25 F10000; Dip out</b><br><b>G0 X101.4 Y140 Z25 F10000</b><br><b>G0 X101.4 Y140 Z7 F10000; Dip in</b><br><b>G4 S1</b><br><b>G0 X101.4 Y140 Z25 F10000; Dip out</b><br><b>G0 X101.4 Y140 Z25 F10000</b><br><b>G0 X101.4 Y140 Z7 F10000;Dip in</b><br><b>G4 S1</b><br><b>G0 X101.4 Y140 Z25 F10000;Dip out</b> | Temperature measurement at well B3; followed by thermocouple cleanup. |

|                                                                                                                                                                                                                                                                                                                                                                                                                                                                                                                                                                                                                                                                                                                                                                                                                                                                                                                                                                                              |                                                                                                              |
|----------------------------------------------------------------------------------------------------------------------------------------------------------------------------------------------------------------------------------------------------------------------------------------------------------------------------------------------------------------------------------------------------------------------------------------------------------------------------------------------------------------------------------------------------------------------------------------------------------------------------------------------------------------------------------------------------------------------------------------------------------------------------------------------------------------------------------------------------------------------------------------------------------------------------------------------------------------------------------------------|--------------------------------------------------------------------------------------------------------------|
| <p> <b>G0 X172 Y148 Z25 F10000;Laser Start Position</b><br/> <b>G4 S30</b><br/> <b>G0 X137.4 Y139 Z25 F10000</b><br/> <b>G0 X137.4 Y139 Z7 F10000;Dip in</b><br/> <b>G4 S1</b><br/> <b>G0 X137.4 Y139 Z25 F10000;Dip out</b><br/> <b>G0 X137.4 Y139 Z25 F10000</b><br/> <b>G0 X137.4 Y139 Z7 F10000;Dip in</b><br/> <b>G4 S1</b><br/> <b>G0 X137.4 Y139 Z25 F10000;Dip out</b><br/> <b>G0 X137.4 Y139 Z25 F10000</b><br/> <b>G0 X137.4 Y139 Z7 F10000;Dip in</b><br/> <b>G4 S30</b><br/> <b>G0 X137.4 Y139 Z25 F10000;Dip out</b><br/> <b>G0 X101.4 Y131 Z25 F10000</b><br/> <b>G0 X101.4 Y131 Z7 F10000;Dip in</b><br/> <b>G4 S1</b><br/> <b>G0 X101.4 Y131 Z25 F10000;Dip out</b><br/> <b>G0 X101.4 Y131 Z25 F10000</b><br/> <b>G0 X101.4 Y131 Z7 F10000;Dip in</b><br/> <b>G4 S1</b><br/> <b>G0 X101.4 Y131 Z25 F10000;Dip out</b><br/> <b>G0 X101.4 Y131 Z25 F10000</b><br/> <b>G0 X101.4 Y131 Z7 F10000;Dip in</b><br/> <b>G4 S1</b><br/> <b>G0 X101.4 Y131 Z25 F10000;Dip out</b> </p> | <p>Temperature measurement at well B5; followed by thermocouple cleanup.</p>                                 |
| <p> <b>G0 X190 Y148 Z25 F10000;Laser Start Position</b><br/> <b>M106 S255</b><br/> <b>G4 S60</b><br/> <b>M107 S15</b><br/> <b>G0 X155.4 Y139 Z25 F10000</b><br/> <b>G0 X155.4 Y139 Z7 F10000;Dip in</b><br/> <b>G4 S1</b><br/> <b>G0 X155.4 Y139 Z25 F10000;Dip out</b><br/> <b>G0 X155.4 Y139 Z25 F10000</b><br/> <b>G0 X155.4 Y139 Z7 F10000;Dip in</b><br/> <b>G4 S1</b><br/> <b>G0 X155.4 Y139 Z25 F10000;Dip out</b><br/> <b>G0 X155.4 Y139 Z25 F10000</b><br/> <b>G0 X155.4 Y139 Z7 F10000;Dip in</b><br/> <b>G4 S30</b><br/> <b>G0 X155.4 Y139 Z25 F10000;Dip out</b><br/> <b>G0 X101.4 Y122 Z25 F10000</b><br/> <b>G0 X101.4 Y122 Z7 F10000;Dip in</b><br/> <b>G4 S1</b><br/> <b>G0 X101.4 Y122 Z25 F10000;Dip out</b> </p>                                                                                                                                                                                                                                                          | <p>Laser irradiation for 1 min and temperature measurement at well B7; followed by thermocouple cleanup.</p> |

|                                                                                                                                                                                                                                                                                                                                                                                                                                                                                                                                                                                                                                                                                                                                                                                                                                                                                                                                                                                                                                          |                                                                                                               |
|------------------------------------------------------------------------------------------------------------------------------------------------------------------------------------------------------------------------------------------------------------------------------------------------------------------------------------------------------------------------------------------------------------------------------------------------------------------------------------------------------------------------------------------------------------------------------------------------------------------------------------------------------------------------------------------------------------------------------------------------------------------------------------------------------------------------------------------------------------------------------------------------------------------------------------------------------------------------------------------------------------------------------------------|---------------------------------------------------------------------------------------------------------------|
| <p> <b>G0 X101.4 Y122 Z25 F10000</b><br/> <b>G0 X101.4 Y122 Z7 F10000;Dip in</b><br/> <b>G4 S1</b><br/> <b>G0 X101.4 Y122 Z25 F10000;Dip out</b><br/> <b>G0 X101.4 Y122 Z25 F10000</b><br/> <b>G0 X101.4 Y122 Z7 F10000;Dip in</b><br/> <b>G4 S1</b><br/> <b>G0 X101.4 Y122 Z25 F10000;Dip out</b> </p>                                                                                                                                                                                                                                                                                                                                                                                                                                                                                                                                                                                                                                                                                                                                  |                                                                                                               |
| <p> <b>G0 X208 Y148 Z25 F10000;Laser Start Position</b><br/> <b>M106 S255</b><br/> <b>G4 S300</b><br/> <b>M107 S15</b><br/> <b>G0 X173.4 Y139 Z25 F10000</b><br/> <b>G0 X173.4 Y139 Z7 F10000;Dip in</b><br/> <b>G4 S1</b><br/> <b>G0 X173.4 Y139 Z25 F10000;Dip out</b><br/> <b>G0 X173.4 Y139 Z25 F10000</b><br/> <b>G0 X173.4 Y139 Z7 F10000;Dip in</b><br/> <b>G4 S1</b><br/> <b>G0 X173.4 Y139 Z25 F10000;Dip out</b><br/> <b>G0 X173.4 Y139 Z25 F10000</b><br/> <b>G0 X173.4 Y139 Z7 F10000;Dip in</b><br/> <b>G4 S30</b><br/> <b>G0 X173.4 Y139 Z25 F10000;Dip out</b><br/> <b>G0 X101.4 Y113 Z25 F10000</b><br/> <b>G0 X101.4 Y113 Z7 F10000;Dip in</b><br/> <b>G4 S1</b><br/> <b>G0 X101.4 Y113 Z25 F10000;Dip out</b><br/> <b>G0 X101.4 Y113 Z25 F10000</b><br/> <b>G0 X101.4 Y113 Z7 F10000;Dip in</b><br/> <b>G4 S1</b><br/> <b>G0 X101.4 Y113 Z25 F10000;Dip out</b><br/> <b>G0 X101.4 Y113 Z25 F10000</b><br/> <b>G0 X101.4 Y113 Z7 F10000;Dip in</b><br/> <b>G4 S1</b><br/> <b>G0 X101.4 Y113 Z25 F10000;Dip out</b> </p> | <p>Laser irradiation for 5 min and temperature measurement at well B9; followed by thermocouple cleanup.</p>  |
| <p> <b>G0 X226 Y148 Z25 F10000;Laser Start Position</b><br/> <b>M106 S255</b><br/> <b>G4 S600</b><br/> <b>M107 S15</b><br/> <b>G0 X191.4 Y139 Z25 F10000</b><br/> <b>G0 X191.4 Y139 Z7 F10000;Dip in</b><br/> <b>G4 S1</b><br/> <b>G0 X191.4 Y139 Z25 F10000;Dip out</b><br/> <b>G0 X191.4 Y139 Z25 F10000</b><br/> <b>G0 X191.4 Y139 Z7 F10000;Dip in</b> </p>                                                                                                                                                                                                                                                                                                                                                                                                                                                                                                                                                                                                                                                                          | <p>Laser irradiation for 5 min and temperature measurement at well B11; followed by thermocouple cleanup.</p> |

|                                                                                                                                                                                                                                                                                                                                                                                                                                                                                                                                                                                                                                                                                                                                                                                             |                                                                              |
|---------------------------------------------------------------------------------------------------------------------------------------------------------------------------------------------------------------------------------------------------------------------------------------------------------------------------------------------------------------------------------------------------------------------------------------------------------------------------------------------------------------------------------------------------------------------------------------------------------------------------------------------------------------------------------------------------------------------------------------------------------------------------------------------|------------------------------------------------------------------------------|
| <p>G4 S1<br/> G0 X191.4 Y139 Z25 F10000;Dip out<br/> G0 X191.4 Y139 Z25 F10000<br/> G0 X191.4 Y139 Z7 F10000;Dip in<br/> G4 S30<br/> G0 X191.4 Y139 Z25 F10000;Dip out<br/> G0 X101.4 Y104 Z25 F10000<br/> G0 X101.4 Y104 Z7 F10000;Dip in<br/> G4 S1<br/> G0 X101.4 Y104 Z25 F10000;Dip out<br/> G0 X101.4 Y104 Z25 F10000<br/> G0 X101.4 Y104 Z7 F10000;Dip in<br/> G4 S1<br/> G0 X101.4 Y104 Z25 F10000;Dip out<br/> G0 X101.4 Y104 Z25 F10000<br/> G0 X101.4 Y104 Z7 F10000;Dip in<br/> G4 S1<br/> G0 X101.4 Y104 Z25 F10000;Dip out</p>                                                                                                                                                                                                                                                |                                                                              |
| <p>G0 X154 Y130 Z25 F10000;Laser Start Position<br/> G4 S30<br/> G0 X119.4 Y121 Z25 F10000<br/> G0 X119.4 Y121 Z7 F10000;Dip in<br/> G4 S1<br/> G0 X119.4 Y121 Z25 F10000;Dip out<br/> G0 X119.4 Y121 Z25 F10000<br/> G0 X119.4 Y121 Z7 F10000;Dip in<br/> G4 S1<br/> G0 X119.4 Y121 Z25 F10000;Dip out<br/> G0 X119.4 Y121 Z25 F10000<br/> G0 X119.4 Y121 Z7 F10000;Dip in<br/> G4 S30<br/> G0 X119.4 Y121 Z25 F10000;Dip out<br/> G0 X101.4 Y86 Z25 F10000<br/> G0 X101.4 Y86 Z7 F10000;Dip in<br/> G4 S1<br/> G0 X101.4 Y86 Z25 F10000;Dip out<br/> G0 X101.4 Y86 Z25 F10000<br/> G0 X101.4 Y86 Z7 F10000;Dip in<br/> G4 S1<br/> G0 X101.4 Y86 Z25 F10000;Dip out<br/> G0 X101.4 Y86 Z25 F10000<br/> G0 X101.4 Y86 Z7 F10000;Dip in<br/> G4 S1<br/> G0 X101.4 Y86 Z25 F10000;Dip out</p> | <p>Temperature measurement at well D3; followed by thermocouple cleanup.</p> |
| <p>G0 X172 Y130 Z25 F10000;Laser Start Position<br/> G4 S30</p>                                                                                                                                                                                                                                                                                                                                                                                                                                                                                                                                                                                                                                                                                                                             | <p>Temperature measurement at well D5;</p>                                   |

|                                                                                                                                                                                                                                                                                                                                                                                                                                                                                                                                                                                                                                                                                                                                                                                                                                                                                                         |                                                                                                              |
|---------------------------------------------------------------------------------------------------------------------------------------------------------------------------------------------------------------------------------------------------------------------------------------------------------------------------------------------------------------------------------------------------------------------------------------------------------------------------------------------------------------------------------------------------------------------------------------------------------------------------------------------------------------------------------------------------------------------------------------------------------------------------------------------------------------------------------------------------------------------------------------------------------|--------------------------------------------------------------------------------------------------------------|
| <p> <b>G0 X137.4 Y121 Z25 F10000</b><br/> <b>G0 X137.4 Y121 Z7 F10000;Dip in</b><br/> <b>G4 S1</b><br/> <b>G0 X137.4 Y121 Z25 F10000;Dip out</b><br/> <b>G0 X137.4 Y121 Z25 F10000</b><br/> <b>G0 X137.4 Y121 Z7 F10000;Dip in</b><br/> <b>G4 S1</b><br/> <b>G0 X137.4 Y121 Z25 F10000;Dip out</b><br/> <b>G0 X137.4 Y121 Z25 F10000</b><br/> <b>G0 X137.4 Y121 Z7 F10000;Dip in</b><br/> <b>G4 S30</b><br/> <b>G0 X137.4 Y121 Z25 F10000;Dip out</b><br/> <b>G0 X110.4 Y86 Z25 F10000</b><br/> <b>G0 X110.4 Y86 Z7 F10000;Dip in</b><br/> <b>G4 S1</b><br/> <b>G0 X110.4 Y86 Z25 F10000;Dip out</b><br/> <b>G0 X110.4 Y86 Z25 F10000</b><br/> <b>G0 X110.4 Y86 Z7 F10000;Dip in</b><br/> <b>G4 S1</b><br/> <b>G0 X110.4 Y86 Z25 F10000;Dip out</b><br/> <b>G0 X110.4 Y86 Z25 F10000</b><br/> <b>G0 X110.4 Y86 Z7 F10000;Dip in</b><br/> <b>G4 S1</b><br/> <b>G0 X110.4 Y86 Z25 F10000;Dip out</b> </p> | <p>followed by thermocouple cleanup.</p>                                                                     |
| <p> <b>G0 X190 Y130 Z25 F10000;Laser Start Position</b><br/> <b>M106 S255</b><br/> <b>G4 S60</b><br/> <b>M107 S15</b><br/> <b>G0 X155.4 Y121 Z25 F10000</b><br/> <b>G0 X155.4 Y121 Z7 F10000;Dip in</b><br/> <b>G4 S1</b><br/> <b>G0 X155.4 Y121 Z25 F10000;Dip out</b><br/> <b>G0 X155.4 Y121 Z25 F10000</b><br/> <b>G0 X155.4 Y121 Z7 F10000;Dip in</b><br/> <b>G4 S1</b><br/> <b>G0 X155.4 Y121 Z25 F10000;Dip out</b><br/> <b>G0 X155.4 Y121 Z25 F10000</b><br/> <b>G0 X155.4 Y121 Z7 F10000;Dip in</b><br/> <b>G4 S30</b><br/> <b>G0 X155.4 Y121 Z25 F10000;Dip out</b><br/> <b>G0 X119.4 Y86 Z25 F10000</b><br/> <b>G0 X119.4 Y86 Z7 F10000;Dip in</b><br/> <b>G4 S1</b><br/> <b>G0 X119.4 Y86 Z25 F10000;Dip out</b><br/> <b>G0 X119.4 Y86 Z25 F10000</b><br/> <b>G0 X119.4 Y86 Z7 F10000;Dip in</b> </p>                                                                                        | <p>Laser irradiation for 1 min and temperature measurement at well D7; followed by thermocouple cleanup.</p> |

|                                                                                                                                                                                                                                                                                                                                                                                                                                                                                                                                                                                                                                                                                                                                                                                                                           |                                                                                                                |
|---------------------------------------------------------------------------------------------------------------------------------------------------------------------------------------------------------------------------------------------------------------------------------------------------------------------------------------------------------------------------------------------------------------------------------------------------------------------------------------------------------------------------------------------------------------------------------------------------------------------------------------------------------------------------------------------------------------------------------------------------------------------------------------------------------------------------|----------------------------------------------------------------------------------------------------------------|
| <p>G4 S1<br/> G0 X119.4 Y86 Z25 F10000;Dip out<br/> G0 X119.4 Y86 Z25 F10000<br/> G0 X119.4 Y86 Z7 F10000;Dip in<br/> G4 S1<br/> G0 X119.4 Y86 Z25 F10000;Dip out</p>                                                                                                                                                                                                                                                                                                                                                                                                                                                                                                                                                                                                                                                     |                                                                                                                |
| <p>G0 X208 Y130 Z25 F10000;Laser Start Position<br/> M106 S255<br/> G4 S300<br/> M107 S15<br/> G0 X173.4 Y121 Z25 F10000<br/> G0 X173.4 Y121 Z7 F10000;Dip in<br/> G4 S1<br/> G0 X173.4 Y121 Z25 F10000;Dip out<br/> G0 X173.4 Y121 Z25 F10000<br/> G0 X173.4 Y121 Z7 F10000;Dip in<br/> G4 S1<br/> G0 X173.4 Y121 Z25 F10000;Dip out<br/> G0 X173.4 Y121 Z25 F10000<br/> G0 X173.4 Y121 Z7 F10000;Dip in<br/> G4 S30<br/> G0 X173.4 Y121 Z25 F10000;Dip out<br/> G0 X128.4 Y86 Z25 F10000<br/> G0 X128.4 Y86 Z7 F10000;Dip in<br/> G4 S1<br/> G0 X128.4 Y86 Z25 F10000;Dip out<br/> G0 X128.4 Y86 Z25 F10000<br/> G0 X128.4 Y86 Z7 F10000;Dip in<br/> G4 S1<br/> G0 X128.4 Y86 Z25 F10000;Dip out<br/> G0 X128.4 Y86 Z25 F10000<br/> G0 X128.4 Y86 Z7 F10000;Dip in<br/> G4 S1<br/> G0 X128.4 Y86 Z25 F10000;Dip out</p> | <p>Laser irradiation for 5 min and temperature measurement at well D9; followed by thermocouple cleanup.</p>   |
| <p>G0 X226 Y130 Z25 F10000;Laser Start Position<br/> M106 S255<br/> G4 S600<br/> M107 S15<br/> G0 X191.4 Y121 Z25 F10000<br/> G0 X191.4 Y121 Z7 F10000;Dip in<br/> G4 S1<br/> G0 X191.4 Y121 Z25 F10000;Dip out<br/> G0 X191.4 Y121 Z25 F10000<br/> G0 X191.4 Y121 Z7 F10000;Dip in<br/> G4 S1<br/> G0 X191.4 Y121 Z25 F10000;Dip out</p>                                                                                                                                                                                                                                                                                                                                                                                                                                                                                 | <p>Laser irradiation for 10 min and temperature measurement at well D11; followed by thermocouple cleanup.</p> |

|                                                                                                                                                                                                                                                                                                                                                                                                                                                                                                                                                                                                                                                                                                                                                                                                                                                                                                                                                                                     |                                                                              |
|-------------------------------------------------------------------------------------------------------------------------------------------------------------------------------------------------------------------------------------------------------------------------------------------------------------------------------------------------------------------------------------------------------------------------------------------------------------------------------------------------------------------------------------------------------------------------------------------------------------------------------------------------------------------------------------------------------------------------------------------------------------------------------------------------------------------------------------------------------------------------------------------------------------------------------------------------------------------------------------|------------------------------------------------------------------------------|
| <p> <b>G0 X191.4 Y121 Z25 F10000</b><br/> <b>G0 X191.4 Y121 Z7 F10000;Dip in</b><br/> <b>G4 S30</b><br/> <b>G0 X191.4 Y121 Z25 F10000;Dip out</b><br/> <b>G0 X137.4 Y86 Z25 F10000</b><br/> <b>G0 X137.4 Y86 Z7 F10000;Dip in</b><br/> <b>G4 S1</b><br/> <b>G0 X137.4 Y86 Z25 F10000;Dip out</b><br/> <b>G0 X137.4 Y86 Z25 F10000</b><br/> <b>G0 X137.4 Y86 Z7 F10000;Dip in</b><br/> <b>G4 S1</b><br/> <b>G0 X137.4 Y86 Z25 F10000;Dip out</b><br/> <b>G0 X137.4 Y86 Z25 F10000</b><br/> <b>G0 X137.4 Y86 Z7 F10000;Dip in</b><br/> <b>G4 S1</b><br/> <b>G0 X137.4 Y86 Z25 F10000;Dip out</b> </p>                                                                                                                                                                                                                                                                                                                                                                                 |                                                                              |
| <p> <b>G0 X154 Y112 Z25 F10000;Laser Start Position</b><br/> <b>G4 S30</b><br/> <b>G0 X119.4 Y103 Z25 F10000</b><br/> <b>G0 X119.4 Y103 Z7 F10000;Dip in</b><br/> <b>G4 S1</b><br/> <b>G0 X119.4 Y103 Z25 F10000;Dip out</b><br/> <b>G0 X119.4 Y103 Z25 F10000</b><br/> <b>G0 X119.4 Y103 Z7 F10000;Dip in</b><br/> <b>G4 S1</b><br/> <b>G0 X119.4 Y103 Z25 F10000;Dip out</b><br/> <b>G0 X119.4 Y103 Z25 F10000</b><br/> <b>G0 X119.4 Y103 Z7 F10000;Dip in</b><br/> <b>G4 S30</b><br/> <b>G0 X119.4 Y103 Z25 F10000;Dip out</b><br/> <b>G0 X155.4 Y86 Z25 F10000</b><br/> <b>G0 X155.4 Y86 Z7 F10000;Dip in</b><br/> <b>G4 S1</b><br/> <b>G0 X155.4 Y86 Z25 F10000;Dip out</b><br/> <b>G0 X155.4 Y86 Z25 F10000</b><br/> <b>G0 X155.4 Y86 Z7 F10000;Dip in</b><br/> <b>G4 S1</b><br/> <b>G0 X155.4 Y86 Z25 F10000;Dip out</b><br/> <b>G0 X155.4 Y86 Z25 F10000</b><br/> <b>G0 X155.4 Y86 Z7 F10000;Dip in</b><br/> <b>G4 S1</b><br/> <b>G0 X155.4 Y86 Z25 F10000;Dip out</b> </p> | <p>Temperature measurement at well F3; followed by thermocouple cleanup.</p> |
| <p> <b>G0 X172 Y112 Z25 F10000;Laser Start Position</b><br/> <b>G4 S30</b><br/> <b>G0 X137.4 Y103 Z25 F10000</b><br/> <b>G0 X137.4 Y103 Z7 F10000;Dip in</b> </p>                                                                                                                                                                                                                                                                                                                                                                                                                                                                                                                                                                                                                                                                                                                                                                                                                   | <p>Temperature measurement at well F5; followed by thermocouple cleanup.</p> |



|                                                                                                                                                                                                                                                                                                                                                                                                                                                                                                                                                                                                                                                                                                                                                                                                                                                                                 |                                                                                                                |
|---------------------------------------------------------------------------------------------------------------------------------------------------------------------------------------------------------------------------------------------------------------------------------------------------------------------------------------------------------------------------------------------------------------------------------------------------------------------------------------------------------------------------------------------------------------------------------------------------------------------------------------------------------------------------------------------------------------------------------------------------------------------------------------------------------------------------------------------------------------------------------|----------------------------------------------------------------------------------------------------------------|
| <p> <b>G4 S1</b><br/> <b>G0 X137.4 Y103 Z25 F10000;Dip out</b><br/> <b>G0 X137.4 Y103 Z25 F10000</b><br/> <b>G0 X137.4 Y103 Z7 F10000;Dip in</b><br/> <b>G4 S1</b><br/> <b>G0 X137.4 Y103 Z25 F10000;Dip out</b><br/> <b>G0 X137.4 Y103 Z25 F10000</b><br/> <b>G0 X137.4 Y103 Z7 F10000;Dip in</b><br/> <b>G4 S30</b><br/> <b>G0 X137.4 Y103 Z25 F10000;Dip out</b><br/> <b>G0 X164.4 Y86 Z25 F10000</b><br/> <b>G0 X164.4 Y86 Z7 F10000;Dip in</b><br/> <b>G4 S1</b><br/> <b>G0 X164.4 Y86 Z25 F10000;Dip out</b><br/> <b>G0 X164.4 Y86 Z25 F10000</b><br/> <b>G0 X164.4 Y86 Z7 F10000;Dip in</b><br/> <b>G4 S1</b><br/> <b>G0 X164.4 Y86 Z25 F10000;Dip out</b><br/> <b>G0 X164.4 Y86 Z25 F10000</b><br/> <b>G0 X164.4 Y86 Z7 F10000;Dip in</b><br/> <b>G4 S1</b><br/> <b>G0 X164.4 Y86 Z25 F10000;Dip out</b> </p>                                                           |                                                                                                                |
| <p> <b>G0 X190 Y112 Z25 F10000;Laser Start Position</b><br/> <b>M106 S255</b><br/> <b>G4 S60</b><br/> <b>M107 S15</b><br/> <b>G0 X155.4 Y103 Z25 F10000</b><br/> <b>G0 X155.4 Y103 Z7 F10000;Dip in</b><br/> <b>G4 S1</b><br/> <b>G0 X155.4 Y103 Z25 F10000;Dip out</b><br/> <b>G0 X155.4 Y103 Z25 F10000</b><br/> <b>G0 X155.4 Y103 Z7 F10000;Dip in</b><br/> <b>G4 S1</b><br/> <b>G0 X155.4 Y103 Z25 F10000;Dip out</b><br/> <b>G0 X155.4 Y103 Z25 F10000</b><br/> <b>G0 X155.4 Y103 Z7 F10000;Dip in</b><br/> <b>G4 S30</b><br/> <b>G0 X155.4 Y103 Z25 F10000;Dip out</b><br/> <b>G0 X173.4 Y86 Z25 F10000</b><br/> <b>G0 X173.4 Y86 Z7 F10000;Dip in</b><br/> <b>G4 S1</b><br/> <b>G0 X173.4 Y86 Z25 F10000;Dip out</b><br/> <b>G0 X173.4 Y86 Z25 F10000</b><br/> <b>G0 X173.4 Y86 Z7 F10000;Dip in</b><br/> <b>G4 S1</b><br/> <b>G0 X173.4 Y86 Z25 F10000;Dip out</b> </p> | <p> Laser irradiation for 1 min and temperature measurement at well F7; followed by thermocouple cleanup. </p> |

|                                                                                                                                                                                                                                                                                                                                                                                                                                                                                                                                                                                                                                                                                                                                                                                                                                                                                                                                                                                                                               |                                                                                                                |
|-------------------------------------------------------------------------------------------------------------------------------------------------------------------------------------------------------------------------------------------------------------------------------------------------------------------------------------------------------------------------------------------------------------------------------------------------------------------------------------------------------------------------------------------------------------------------------------------------------------------------------------------------------------------------------------------------------------------------------------------------------------------------------------------------------------------------------------------------------------------------------------------------------------------------------------------------------------------------------------------------------------------------------|----------------------------------------------------------------------------------------------------------------|
| <p><b>G0 X173.4 Y86 Z25 F10000</b><br/> <b>G0 X173.4 Y86 Z7 F10000;Dip in</b><br/> <b>G4 S1</b><br/> <b>G0 X173.4 Y86 Z25 F10000;Dip out</b></p>                                                                                                                                                                                                                                                                                                                                                                                                                                                                                                                                                                                                                                                                                                                                                                                                                                                                              |                                                                                                                |
| <p><b>G0 X208 Y112 Z25 F10000;Laser Start Position</b><br/> <b>M106 S255</b><br/> <b>G4 S300</b><br/> <b>M107 S15</b><br/> <b>G0 X173.4 Y103 Z25 F10000</b><br/> <b>G0 X173.4 Y103 Z7 F10000;Dip in</b><br/> <b>G4 S1</b><br/> <b>G0 X173.4 Y103 Z25 F10000;Dip out</b><br/> <b>G0 X173.4 Y103 Z25 F10000</b><br/> <b>G0 X173.4 Y103 Z7 F10000;Dip in</b><br/> <b>G4 S1</b><br/> <b>G0 X173.4 Y103 Z25 F10000;Dip out</b><br/> <b>G0 X173.4 Y103 Z25 F10000</b><br/> <b>G0 X173.4 Y103 Z7 F10000;Dip in</b><br/> <b>G4 S30</b><br/> <b>G0 X173.4 Y103 Z25 F10000;Dip out</b><br/> <b>G0 X182.4 Y86 Z25 F10000</b><br/> <b>G0 X182.4 Y86 Z7 F10000;Dip in</b><br/> <b>G4 S1</b><br/> <b>G0 X182.4 Y86 Z25 F10000;Dip out</b><br/> <b>G0 X182.4 Y86 Z25 F10000</b><br/> <b>G0 X182.4 Y86 Z7 F10000;Dip in</b><br/> <b>G4 S1</b><br/> <b>G0 X182.4 Y86 Z25 F10000;Dip out</b><br/> <b>G0 X182.4 Y86 Z25 F10000</b><br/> <b>G0 X182.4 Y86 Z7 F10000;Dip in</b><br/> <b>G4 S1</b><br/> <b>G0 X182.4 Y86 Z25 F10000;Dip out</b></p> | <p>Laser irradiation for 5 min and temperature measurement at well F9; followed by thermocouple cleanup.</p>   |
| <p><b>G0 X226 Y112 Z25 F10000;Laser Start Position</b><br/> <b>M106 S255</b><br/> <b>G4 S600</b><br/> <b>M107 S15</b><br/> <b>G0 X191.4 Y103 Z25 F10000</b><br/> <b>G0 X191.4 Y103 Z7 F10000;Dip in</b><br/> <b>G4 S1</b><br/> <b>G0 X191.4 Y103 Z25 F10000;Dip out</b><br/> <b>G0 X191.4 Y103 Z25 F10000</b><br/> <b>G0 X191.4 Y103 Z7 F10000;Dip in</b><br/> <b>G4 S1</b><br/> <b>G0 X191.4 Y103 Z25 F10000;Dip out</b><br/> <b>G0 X191.4 Y103 Z25 F10000</b><br/> <b>G0 X191.4 Y103 Z7 F10000;Dip in</b></p>                                                                                                                                                                                                                                                                                                                                                                                                                                                                                                               | <p>Laser irradiation for 10 min and temperature measurement at well F11; followed by thermocouple cleanup.</p> |

|                                            |                      |
|--------------------------------------------|----------------------|
| <b>G4 S30</b>                              |                      |
| <b>G0 X191.4 Y103 Z25 F10000;Dip out</b>   |                      |
| <b>G0 X191.4 Y86 Z25 F10000</b>            | Thermocouple cleanup |
| <b>G0 X191.4 Y86 Z7 F10000;Dip in</b>      |                      |
| <b>G4 S1</b>                               |                      |
| <b>G0 X191.4 Y86 Z25 F10000;Dip out</b>    |                      |
| <b>G0 X191.4 Y86 Z25 F10000</b>            |                      |
| <b>G0 X191.4 Y86 Z7 F10000;Dip in</b>      |                      |
| <b>G4 S1</b>                               |                      |
| <b>G0 X191.4 Y86 Z25 F10000;Dip out</b>    |                      |
| <b>G0 X191.4 Y86 Z25 F10000</b>            |                      |
| <b>G0 X191.4 Y86 Z7 F10000;Dip in</b>      |                      |
| <b>G4 S1</b>                               |                      |
| <b>G0 X191.4 Y86 Z25 F10000;Dip out</b>    |                      |
| <b>G0 X200.4 Y86 Z25 F10000</b>            |                      |
| <b>G0 X200.4 Y86 Z7 F10000;Dip in</b>      |                      |
| <b>G4 S1</b>                               |                      |
| <b>G0 X200.4 Y86 Z25 F10000;Dip out</b>    |                      |
| <b>G0 X200.4 Y86 Z25 F10000</b>            |                      |
| <b>G0 X200.4 Y86 Z7 F10000;Dip in</b>      |                      |
| <b>G4 S1</b>                               |                      |
| <b>G0 X200.4 Y86 Z25 F10000;Dip out</b>    |                      |
| <b>G0 X200.4 Y86 Z25 F10000</b>            |                      |
| <b>G0 X200.4 Y86 Z7 F10000;Dip in</b>      |                      |
| <b>G4 S1</b>                               |                      |
| <b>G0 X200.4 Y86 Z25 F10000;Dip out</b>    |                      |
| <b>M140 S44; Turn-off bed</b>              | <b>End Program</b>   |
| <b>M84 X Y; Disable all steppers but Z</b> |                      |

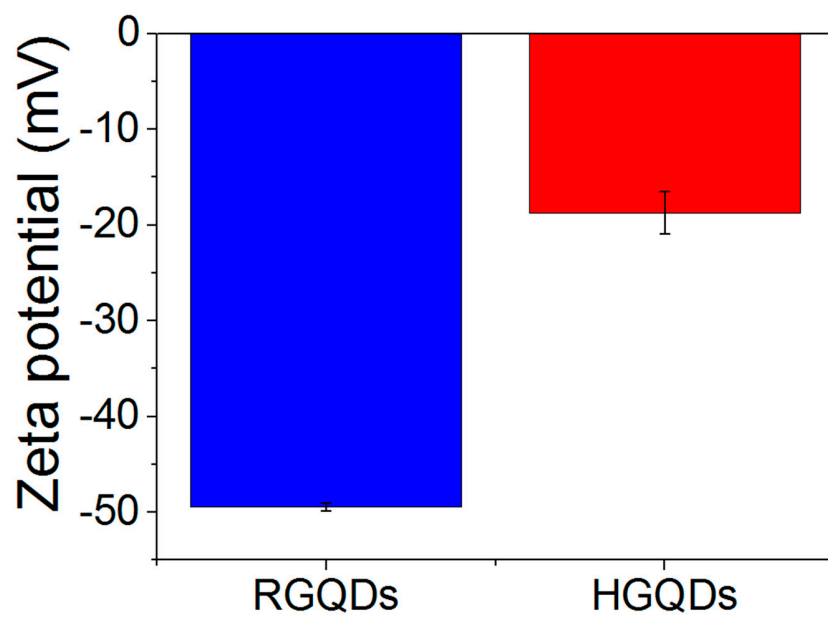

**Figure S2.** Zeta potential of RGQDs (blue) and HGQDs (red).

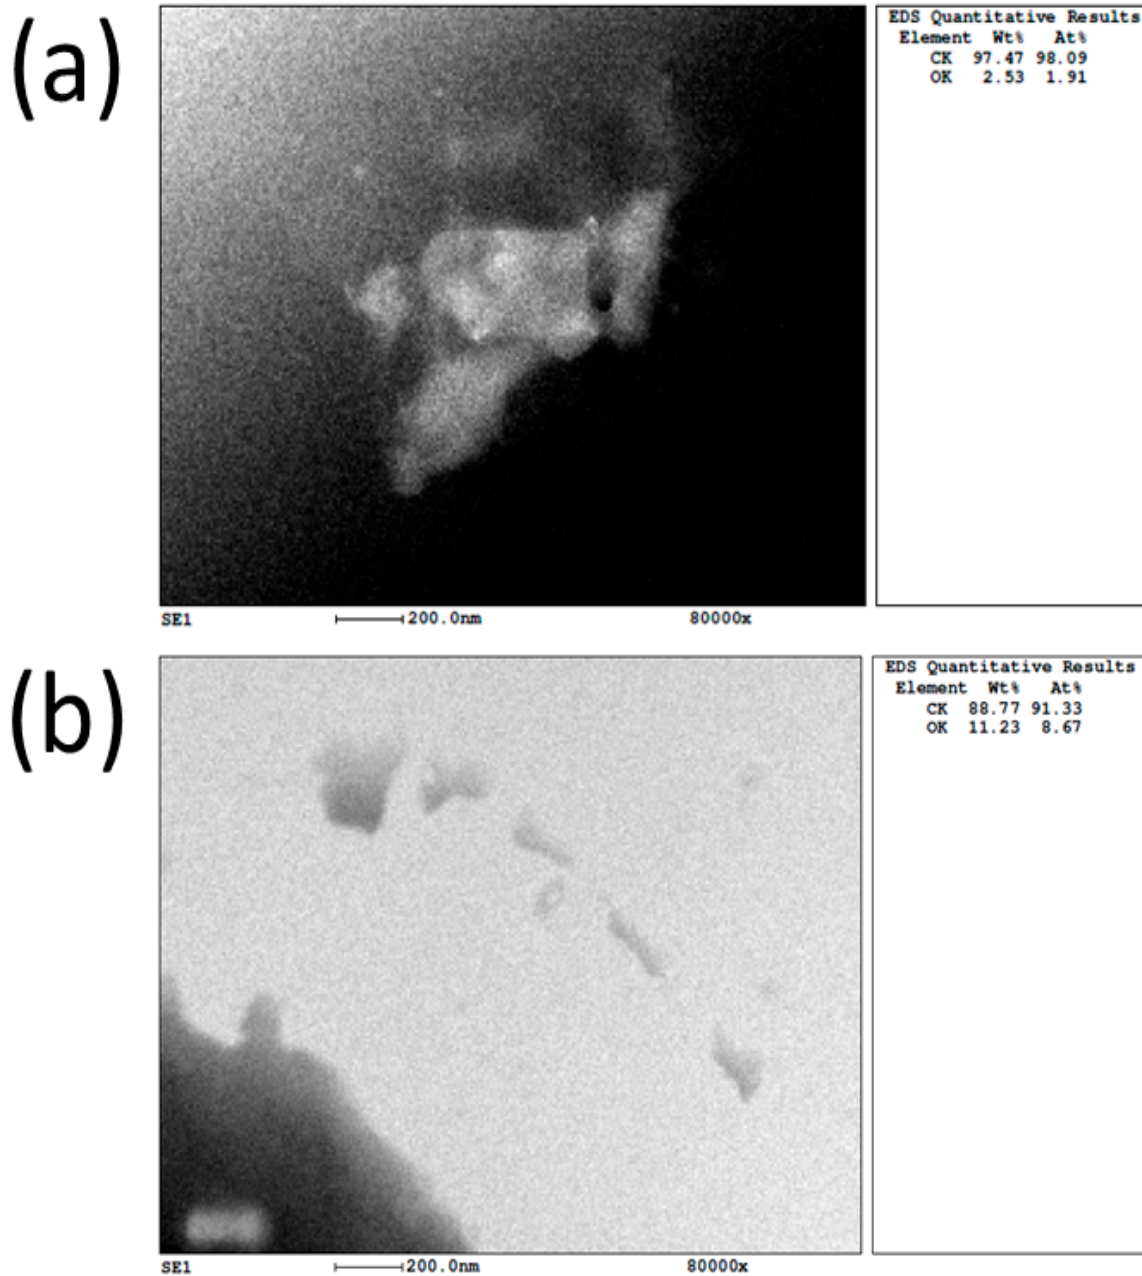

**Figure S3.** EDX images and atomic percentages of carbon and oxygen for a region with (a) HGQDs and (b) RGQDs.

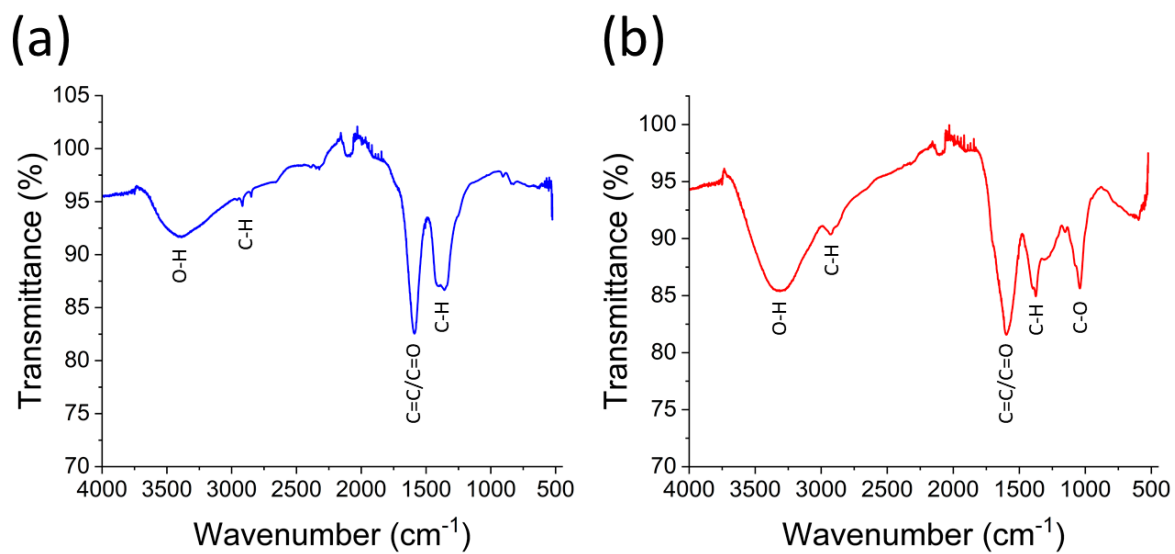

**Figure S4.** FTIR spectra of (a) RGQDs (blue) and (b) HGQDs (red).

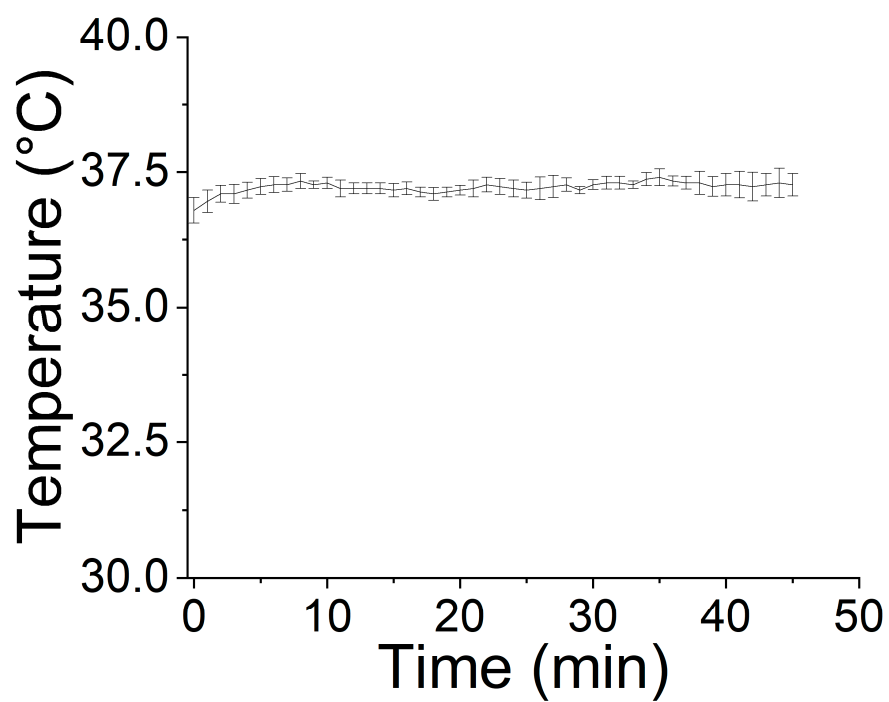

**Figure S5.** Temperature of water control with  $0.9 \text{ W/cm}^2$  808 nm laser irradiation.

**Table S2.** Tabulated results of Figure 5b.

| Well           | Irradiation Time (min) | Temperature (°C) | Cell Viability (%) |
|----------------|------------------------|------------------|--------------------|
| <b>RGQDs</b>   |                        |                  |                    |
| <b>Trial 1</b> |                        |                  |                    |
| B3             | 0                      | 36.9             | 100                |
| B5             | 0                      | 36.9             | 72.7               |
| B7             | 1                      | 39.4             | 92.5               |
| B9             | 5                      | 42.9             | 32.3               |
| B11            | 10                     | 43.6             | 48.6               |
| <b>Trial 2</b> |                        |                  |                    |
| D3             | 0                      | 38.2             | 100                |
| D5             | 0                      | 37.9             | 93.1               |
| D7             | 1                      | 40.1             | 97.5               |
| D9             | 5                      | 43.3             | 49.8               |
| D11            | 10                     | 43.7             | 28.6               |
| <b>Trial 3</b> |                        |                  |                    |
| F3             | 0                      | 38.4             | 100                |
| F5             | 0                      | 38.0             | 101                |
| F7             | 1                      | 40.2             | 92.2               |
| F9             | 5                      | 43.1             | 43.4               |
| F11            | 10                     | 43.3             | 38.7               |
| <b>HGQDs</b>   |                        |                  |                    |
| <b>Trial 1</b> |                        |                  |                    |
| B3             | 0                      | 36.6             | 100                |
| B5             | 0                      | 36.7             | 72.6               |
| B7             | 1                      | 46.2             | 39.6               |
| B9             | 5                      | 55.3             | 23.5               |
| B11            | 10                     | 55.1             | 19.9               |
| <b>Trial 2</b> |                        |                  |                    |
| D3             | 0                      | 38.2             | 100                |
| D5             | 0                      | 37.8             | 57.8               |
| D7             | 1                      | 46.4             | 62.4               |
| D9             | 5                      | 55.0             | 24.1               |
| D11            | 10                     | 54.4             | 21.3               |
| <b>Trial 3</b> |                        |                  |                    |
| F3             | 0                      | 38.1             | 100                |
| F5             | 0                      | 37.8             | 62.2               |
| F7             | 1                      | 46.4             | 38.9               |
| F9             | 5                      | 54.3             | 31.0               |
| F11            | 10                     | 54.1             | 27.8               |

**Table S3.** Table of GQDs developed for PTT applications.

| Synthesis Method | Precursor            | Temperature (°C)                                                               |                                                                                   | Fluorescence |     | Biocompatibility (mg/mL) | Ref.         |
|------------------|----------------------|--------------------------------------------------------------------------------|-----------------------------------------------------------------------------------|--------------|-----|--------------------------|--------------|
|                  |                      | In solution                                                                    | <i>In vitro</i> PTT                                                               | NIR          | VL  |                          |              |
| Bottom-up        | Phenol               | From 0 to ~18 °C for 5 min at 0.1 mg/mL with 1064 nm (1.0 W/cm <sup>2</sup> )  | NA                                                                                | No           | Yes | 0.1                      | 1            |
| Bottom-up        | Citric acid and urea | From ~24 to 45 °C for 5 min at 0.8 mg/mL with 808 nm (1.16 W/cm <sup>2</sup> ) | NA                                                                                | Yes          | Yes | 0.5                      | 2            |
| Bottom-up        | F. racemosa          | From 37 to 45 °C for 5 min at 0.25 mg/mL with 808 nm (0.5 W/cm <sup>2</sup> )  | NA                                                                                | No           | Yes | 0.25                     | 3            |
| Bottom-up        | Hyaluronic acid      | From 37 to 46 °C for 47 min at 1.7 mg/mL with 808 nm (0.9 W/cm <sup>2</sup> )  | From 37.4 to 54.5 °C for 10 min at 1.7 mg/mL with 808 nm (0.9 W/cm <sup>2</sup> ) | Yes          | Yes | 1.7                      | Present work |
| Top-down         | RGO                  | From 37 to 47 °C for 47 min at 1.5 mg/mL with 808 nm (0.9 W/cm <sup>2</sup> )  | From 37.6 to 43.5 °C for 10 min at 1.5 mg/mL with 808 nm (0.9 W/cm <sup>2</sup> ) | Yes          | Yes | 1.5                      | Present work |



## References

1. Liu, H.; Li, C.; Qian, Y.; Hu, L.; Fang, J.; Tong, W.; Nie, R.; Chen, Q.; Wang, H., Magnetic-induced graphene quantum dots for imaging-guided photothermal therapy in the second near-infrared window. *Biomaterials* **2020**, *232*, 119700.
2. Xuan, Y.; Zhang, R.-Y.; Zhang, X.-S.; An, J.; Cheng, K.; Li, C.; Hou, X.-L.; Zhao, Y.-D., Targeting N-doped graphene quantum dot with high photothermal conversion efficiency for dual-mode imaging and therapy in vitro. *Nanotechnology* **2018**, *29*, 355101.
3. Thakur, M.; Kumawat, M.K.; Srivastava, R. Multifunctional graphene quantum dots for combined photothermal and photodynamic therapy coupled with cancer cell tracking applications. *RSC Adv.* **2017**, *7*, 5251–5261.
